# Supplementary material
Source: Springer Nature journal article supplement (https://www.springermedizin.de/resource/supplementary/12936_2005_158_MOESM3_ESM.pdf/9547018)

1a)

Map of Ouagadougou, 2002

X : Anopheles breeding sites

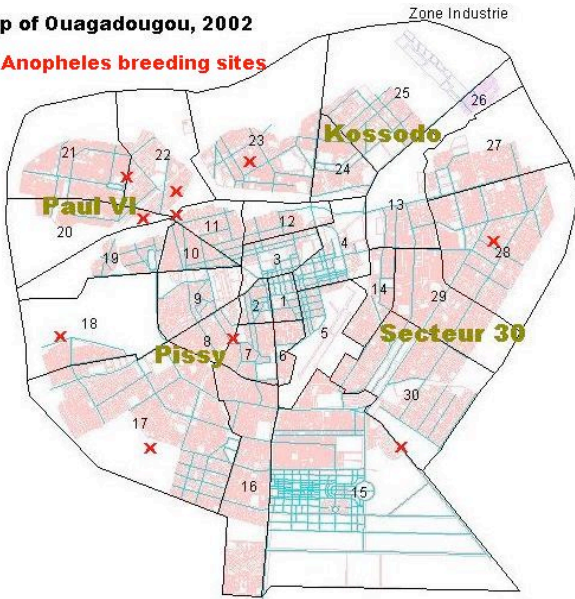

1b)

+ Health facility

★ P.S Primary School

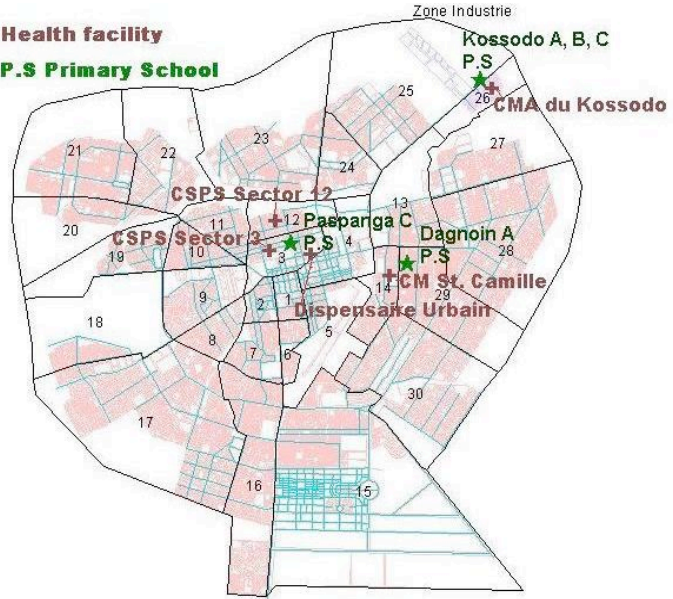

1c)

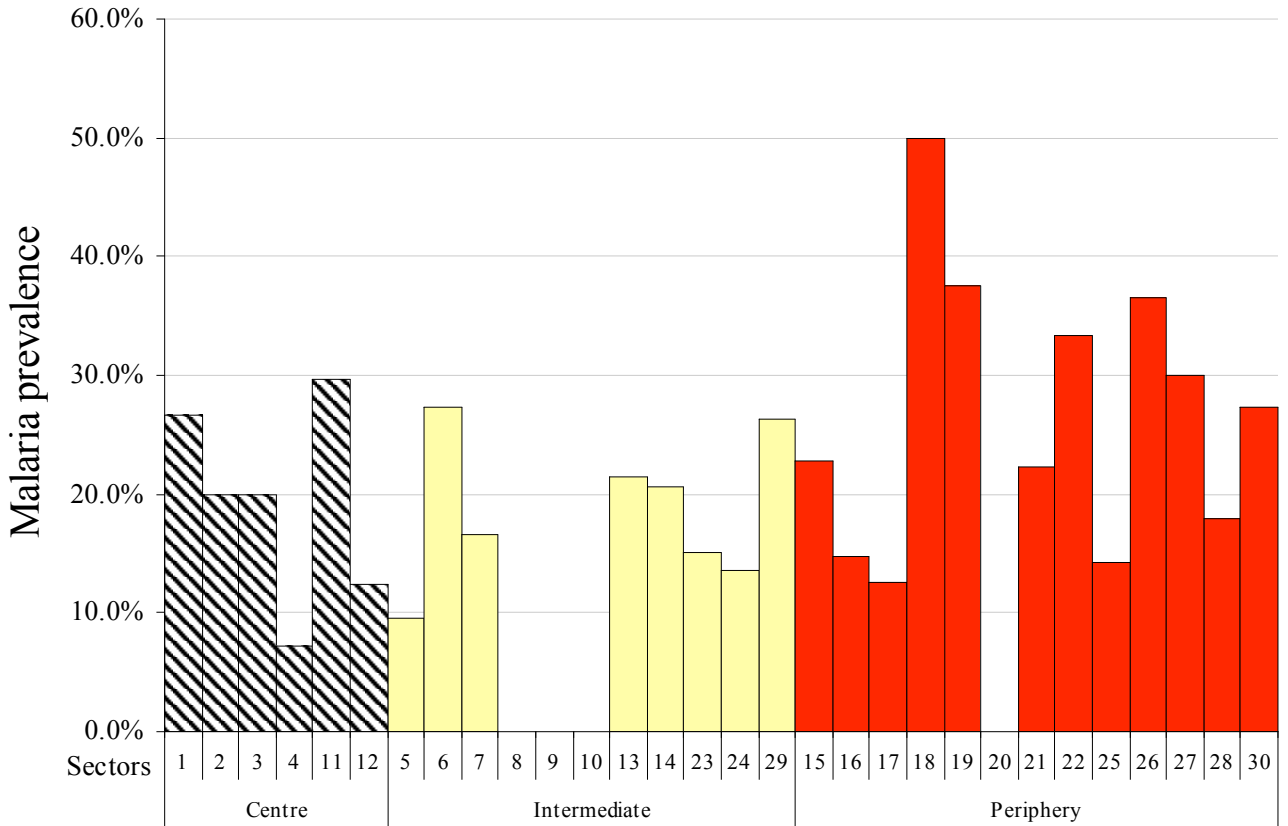

Supplement: MOESM3 [file 9547018]
